# Supplementary material for: Ground-Dwelling Arthropod Communities of a Sky Island Mountain Range in Southeastern Arizona, USA: Obtaining a Baseline for Assessing the Effects of Climate Change
Source: PubMed Central journal article supplement (PMC4558002; doi:10.1371/journal.pone.0135210), 2015-09-02

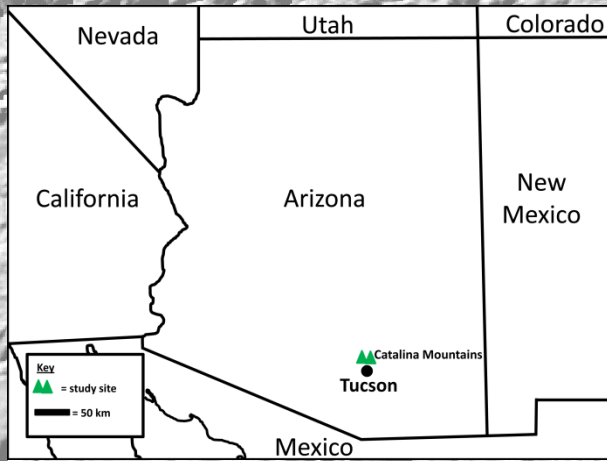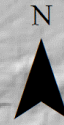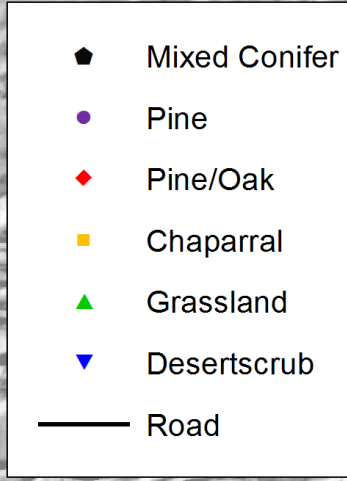

2 4 8 Kilometers

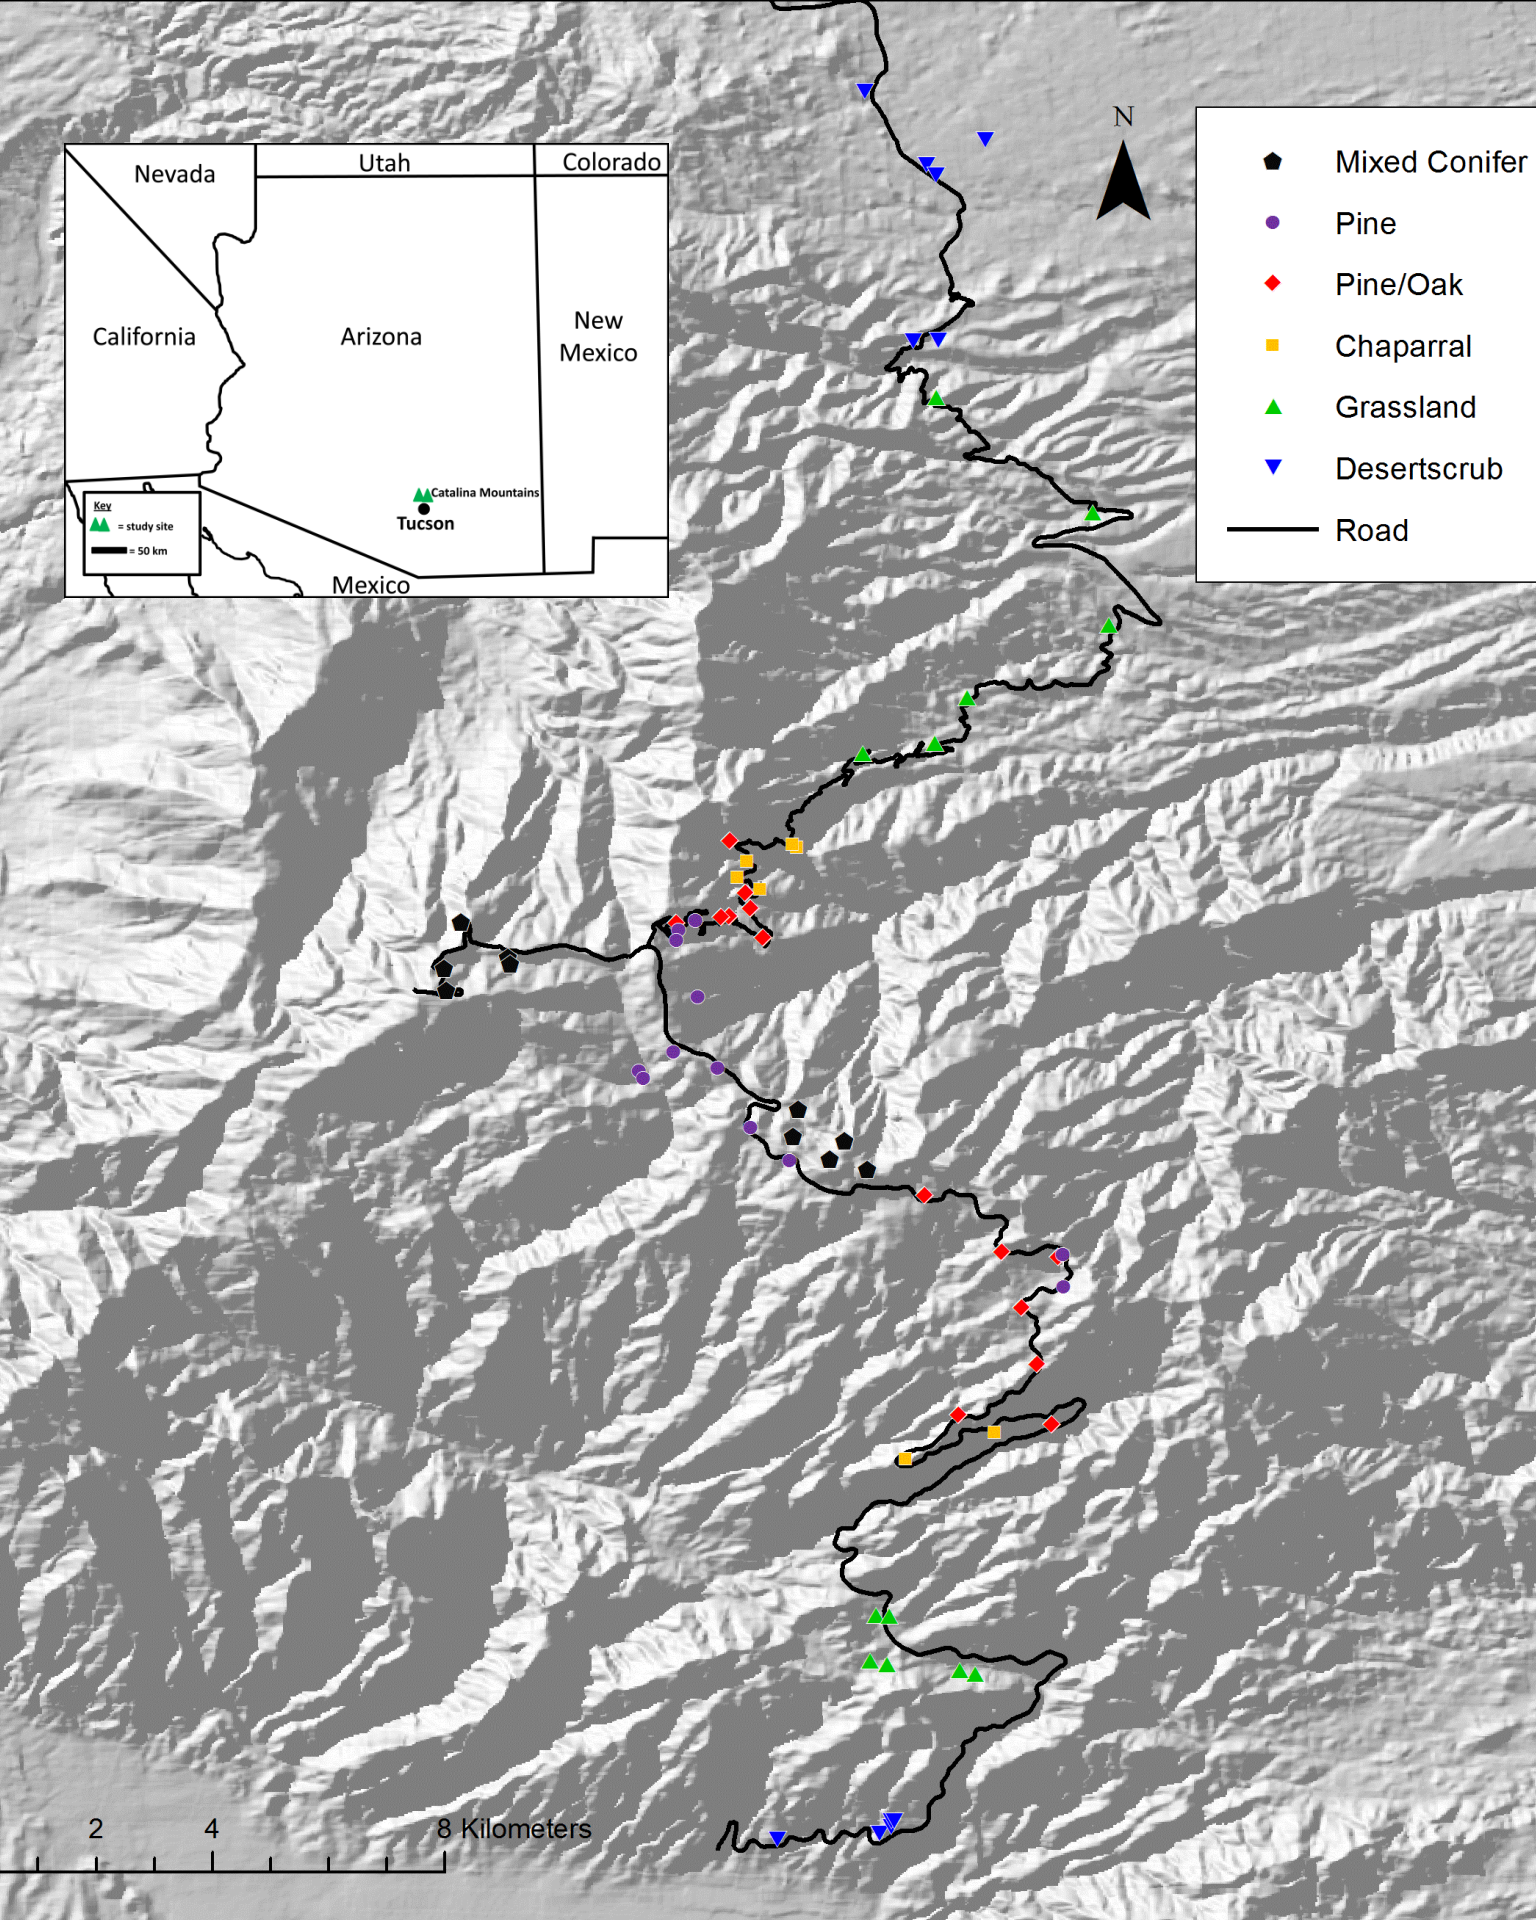

Supplement: pone.0135210.s001.pdf [file pone.0135210.s001.pdf]
